# Supplementary material
Source: MDPI journal article supplement (https://www.mdpi.com/2304-6740/3/4/589)
Supplement: s1 [file s1]

# Supplementary Materials

**Table S1.** Crystal data and structure refinement for apx539\_fulla.

| Identification Code             | apx539_fulla                                                      |
|---------------------------------|-------------------------------------------------------------------|
| Empirical formula               | C <sub>30</sub> H <sub>60</sub> Ce O <sub>2</sub> Si <sub>4</sub> |
| Formula weight                  | 705.26                                                            |
| Temperature                     | 140(1) K                                                          |
| Wavelength                      | 0.71073 Å                                                         |
| Crystal system                  | Monoclinic                                                        |
| Space group                     | P2 <sub>1</sub> /c                                                |
| Unit cell dimensions            | $a = 11.199(6) \text{ Å}$                                         |
|                                 | $b = 34.737(18) \text{ Å}$                                        |
|                                 | $c = 10.931(6) \text{ Å}$                                         |
| Volume                          | 3795(3) Å <sup>3</sup>                                            |
| Z                               | 4                                                                 |
| Density (calculated)            | 1.234 Mg/m <sup>3</sup>                                           |
| Absorption coefficient          | 1.348 mm <sup>-1</sup>                                            |
| $F(000)$                        | 1480                                                              |
| Crystal size                    | 0.120 × 0.100 × 0.080 mm <sup>3</sup>                             |
| Theta range for data collection | 2.037 to 25.782°                                                  |
| Index ranges                    | $-13 \leq h \leq 13, -42 \leq k \leq 42, -13 \leq l \leq 13$      |
| Reflections collected           | 36,532                                                            |
| Independent reflections         | 7265 [R(int) = 0.2058]                                            |
| Completeness to theta = 25.000° | 99.9%                                                             |
| Absorption correction           | Semi-empirical from equivalents                                   |
| Max. and min. transmission      | 0.898 and 0.874                                                   |
| Refinement method               | Full-matrix least-squares on $F^2$                                |
| Data/restraints/parameters      | 7265/31/352                                                       |
| Goodness-of-fit on $F^2$        | 0.966                                                             |
| Final R indices [I > 2sigma(I)] | $R1 = 0.0696, wR2 = 0.1389$                                       |
| R indices (all data)            | $R1 = 0.1595, wR2 = 0.1775$                                       |
| Extinction coefficient          | n/a                                                               |
| Largest diff. peak and hole     | 1.027 and -1.839 e·Å <sup>-3</sup>                                |

**Table S2.** Atomic coordinates ( $\times 10^4$ ) and equivalent isotropic displacement parameters ( $\text{\AA}^2 \times 10^3$ ) for apx539\_fulla. U(eq) is defined as one third of the trace of the orthogonalized  $U^{ij}$  tensor.

|        | <i>x</i>  | <i>y</i> | <i>z</i>   | U(eq)  |
|--------|-----------|----------|------------|--------|
| Ce(1)  | 7318(1)   | 1272(1)  | 9469(1)    | 32(1)  |
| Si(1)  | 4078(3)   | 1148(1)  | 10,387(4)  | 59(1)  |
| Si(2)  | 9288(3)   | 437(1)   | 12,547(3)  | 42(1)  |
| Si(3)  | 10,517(2) | 1975(1)  | 11,906(3)  | 37(1)  |
| Si(4)  | 8495(3)   | 1379(1)  | 6371(3)    | 41(1)  |
| O(1)   | 6218(5)   | 1772(2)  | 8700(6)    | 36(2)  |
| O(2)   | 6263(6)   | 855(2)   | 7984(7)    | 50(2)  |
| C(1)   | 6637(9)   | 778(3)   | 11,079(10) | 43(2)  |
| C(2)   | 5909(9)   | 1117(3)  | 10,989(10) | 43(2)  |
| C(3)   | 6917(8)   | 1393(3)  | 11,737(9)  | 39(2)  |
| C(4)   | 8173(8)   | 1224(2)  | 12,234(9)  | 36(2)  |
| C(5)   | 8027(8)   | 834(2)   | 11,858(8)  | 31(2)  |
| C(6)   | 3524(15)  | 690(4)   | 10,775(16) | 133(6) |
| C(7)   | 3732(10)  | 1546(4)  | 11,265(12) | 82(4)  |
| C(8)   | 3098(11)  | 1225(4)  | 8527(13)   | 100(5) |
| C(9)   | 8580(9)   | 73(2)    | 13,262(9)  | 46(3)  |
| C(10)  | 9586(11)  | 195(3)   | 11,196(11) | 65(3)  |
| C(11)  | 10,902(9) | 620(3)   | 13,900(10) | 53(3)  |
| C(12)  | 9211(8)   | 1708(2)  | 9067(8)    | 31(2)  |
| C(13)  | 9829(8)   | 1621(2)  | 10,488(9)  | 31(2)  |
| C(14)  | 10,067(8) | 1214(2)  | 10,524(9)  | 35(2)  |
| C(15)  | 9588(8)   | 1068(2)  | 9209(9)    | 32(2)  |
| C(16)  | 9032(8)   | 1380(2)  | 8249(9)    | 36(2)  |
| C(17)  | 11,374(9) | 2353(3)  | 11,397(10) | 56(3)  |
| C(18)  | 11,741(9) | 1735(3)  | 13,519(9)  | 50(3)  |
| C(19)  | 9211(8)   | 2213(2)  | 12,253(9)  | 40(2)  |
| C(20)  | 9606(12)  | 1711(3)  | 6041(10)   | 67(3)  |
| C(21)  | 6772(11)  | 1573(4)  | 5386(10)   | 93(5)  |
| C(22)  | 8678(13)  | 895(3)   | 5809(11)   | 70(4)  |
| C(23)  | 5555(8)   | 2128(3)  | 8199(9)    | 39(2)  |
| C(24)  | 6549(9)   | 2415(3)  | 8113(10)   | 51(3)  |
| C(25)  | 4407(9)   | 2062(3)  | 6791(9)    | 55(3)  |
| C(26)  | 5066(8)   | 2280(3)  | 9182(9)    | 43(2)  |
| C(27)  | 5618(11)  | 542(3)   | 7068(11)   | 65(3)  |
| C(28)  | 4570(20)  | 379(6)   | 7330(30)   | 76(6)  |
| C(28') | 5290(50)  | 274(10)  | 7980(40)   | 76(6)  |
| C(29)  | 4959(18)  | 701(5)   | 5573(13)   | 71(5)  |
| C(29') | 4300(30)  | 671(12)  | 6060(40)   | 71(5)  |
| C(30)  | 6665(17)  | 267(4)   | 7150(20)   | 86(6)  |
| C(30') | 5930(160) | 250(30)  | 6300(160)  | 86(6)  |

**Table S3.** Bond lengths [Å] and angles [°] for apx539\_fulla.

|              |           |
|--------------|-----------|
| Ce(1)–O(1)   | 2.077(5)  |
| Ce(1)–O(2)   | 2.097(6)  |
| Ce(1)–C(4)   | 2.733(9)  |
| Ce(1)–C(3)   | 2.743(9)  |
| Ce(1)–C(14)  | 2.764(8)  |
| Ce(1)–C(15)  | 2.774(8)  |
| Ce(1)–C(13)  | 2.791(8)  |
| Ce(1)–C(12)  | 2.798(8)  |
| Ce(1)–C(1)   | 2.799(9)  |
| Ce(1)–C(5)   | 2.810(8)  |
| Ce(1)–C(2)   | 2.811(9)  |
| Ce(1)–C(16)  | 2.812(9)  |
| Si(1)–C(7)   | 1.821(11) |
| Si(1)–C(6)   | 1.826(11) |
| Si(1)–C(8)   | 1.844(13) |
| Si(1)–C(2)   | 1.853(9)  |
| Si(2)–C(9)   | 1.844(9)  |
| Si(2)–C(10)  | 1.855(10) |
| Si(2)–C(11)  | 1.856(10) |
| Si(2)–C(5)   | 1.870(9)  |
| Si(3)–C(13)  | 1.852(9)  |
| Si(3)–C(17)  | 1.854(9)  |
| Si(3)–C(19)  | 1.863(8)  |
| Si(3)–C(18)  | 1.871(9)  |
| Si(4)–C(22)  | 1.833(10) |
| Si(4)–C(20)  | 1.847(10) |
| Si(4)–C(16)  | 1.861(9)  |
| Si(4)–C(21)  | 1.861(11) |
| O(1)–C(23)   | 1.417(10) |
| O(2)–C(27)   | 1.432(12) |
| C(1)–C(5)    | 1.410(11) |
| C(1)–C(2)    | 1.411(11) |
| C(2)–C(3)    | 1.425(12) |
| C(3)–C(4)    | 1.388(11) |
| C(4)–C(5)    | 1.406(11) |
| C(12)–C(16)  | 1.407(11) |
| C(12)–C(13)  | 1.420(11) |
| C(13)–C(14)  | 1.433(11) |
| C(14)–C(15)  | 1.385(11) |
| C(15)–C(16)  | 1.438(11) |
| C(23)–C(26)  | 1.505(12) |
| C(23)–C(25)  | 1.513(12) |
| C(23)–C(24)  | 1.529(12) |
| C(27)–C(28)  | 1.446(14) |
| C(27)–C(29') | 1.455(18) |

**Table S3.** *Cont.*

|                   |           |
|-------------------|-----------|
| C(27)–C(30')      | 1.46(2)   |
| C(27)–C(30)       | 1.485(13) |
| C(27)–C(28')      | 1.523(18) |
| C(27)–C(29)       | 1.558(14) |
| O(1)–Ce(1)–O(2)   | 103.9(2)  |
| O(1)–Ce(1)–C(4)   | 110.2(2)  |
| O(2)–Ce(1)–C(4)   | 127.5(3)  |
| O(1)–Ce(1)–C(3)   | 85.9(2)   |
| O(2)–Ce(1)–C(3)   | 122.7(3)  |
| C(4)–Ce(1)–C(3)   | 29.4(2)   |
| O(1)–Ce(1)–C(14)  | 125.1(2)  |
| O(2)–Ce(1)–C(14)  | 113.9(2)  |
| C(4)–Ce(1)–C(14)  | 76.4(3)   |
| C(3)–Ce(1)–C(14)  | 103.8(3)  |
| O(1)–Ce(1)–C(15)  | 125.1(2)  |
| O(2)–Ce(1)–C(15)  | 88.1(2)   |
| C(4)–Ce(1)–C(15)  | 102.6(2)  |
| C(3)–Ce(1)–C(15)  | 131.5(2)  |
| C(14)–Ce(1)–C(15) | 29.0(2)   |
| O(1)–Ce(1)–C(13)  | 96.1(2)   |
| O(2)–Ce(1)–C(13)  | 136.3(2)  |
| C(4)–Ce(1)–C(13)  | 78.3(2)   |
| C(3)–Ce(1)–C(13)  | 96.8(3)   |
| C(14)–Ce(1)–C(13) | 29.9(2)   |
| C(15)–Ce(1)–C(13) | 49.2(2)   |
| O(1)–Ce(1)–C(12)  | 80.6(2)   |
| O(2)–Ce(1)–C(12)  | 117.1(2)  |
| C(4)–Ce(1)–C(12)  | 107.1(2)  |
| C(3)–Ce(1)–C(12)  | 120.2(3)  |
| C(14)–Ce(1)–C(12) | 47.5(3)   |
| C(15)–Ce(1)–C(12) | 47.7(2)   |
| C(13)–Ce(1)–C(12) | 29.4(2)   |
| O(1)–Ce(1)–C(1)   | 119.2(2)  |
| O(2)–Ce(1)–C(1)   | 81.1(3)   |
| C(4)–Ce(1)–C(1)   | 47.7(3)   |
| C(3)–Ce(1)–C(1)   | 47.5(3)   |
| C(14)–Ce(1)–C(1)  | 105.1(3)  |
| C(15)–Ce(1)–C(1)  | 115.5(2)  |
| C(13)–Ce(1)–C(1)  | 121.7(3)  |
| C(12)–Ce(1)–C(1)  | 150.7(3)  |
| O(1)–Ce(1)–C(5)   | 134.2(2)  |
| O(2)–Ce(1)–C(5)   | 99.8(2)   |
| C(4)–Ce(1)–C(5)   | 29.4(2)   |
| C(3)–Ce(1)–C(5)   | 48.4(2)   |
| C(14)–Ce(1)–C(5)  | 77.2(2)   |

**Table S3.** *Cont.*

|                   |          |
|-------------------|----------|
| C(15)–Ce(1)–C(5)  | 94.0(2)  |
| C(13)–Ce(1)–C(5)  | 93.0(2)  |
| C(12)–Ce(1)–C(5)  | 121.5(2) |
| C(1)–Ce(1)–C(5)   | 29.1(2)  |
| O(1)–Ce(1)–C(2)   | 90.6(2)  |
| O(2)–Ce(1)–C(2)   | 93.1(3)  |
| C(4)–Ce(1)–C(2)   | 49.1(3)  |
| C(3)–Ce(1)–C(2)   | 29.7(3)  |
| C(14)–Ce(1)–C(2)  | 123.7(3) |
| C(15)–Ce(1)–C(2)  | 142.8(3) |
| C(13)–Ce(1)–C(2)  | 125.5(3) |
| C(12)–Ce(1)–C(2)  | 149.7(3) |
| C(1)–Ce(1)–C(2)   | 29.1(2)  |
| C(5)–Ce(1)–C(2)   | 49.1(2)  |
| O(1)–Ce(1)–C(16)  | 95.9(2)  |
| O(2)–Ce(1)–C(16)  | 89.5(3)  |
| C(4)–Ce(1)–C(16)  | 124.0(3) |
| C(3)–Ce(1)–C(16)  | 146.4(3) |
| C(14)–Ce(1)–C(16) | 48.6(3)  |
| C(15)–Ce(1)–C(16) | 29.8(2)  |
| C(13)–Ce(1)–C(16) | 49.6(2)  |
| C(12)–Ce(1)–C(16) | 29.0(2)  |
| C(1)–Ce(1)–C(16)  | 144.8(2) |
| C(5)–Ce(1)–C(16)  | 123.1(2) |
| C(2)–Ce(1)–C(16)  | 172.1(3) |
| C(7)–Si(1)–C(6)   | 111.3(7) |
| C(7)–Si(1)–C(8)   | 108.0(5) |
| C(6)–Si(1)–C(8)   | 106.7(7) |
| C(7)–Si(1)–C(2)   | 108.8(5) |
| C(6)–Si(1)–C(2)   | 107.7(6) |
| C(8)–Si(1)–C(2)   | 114.4(5) |
| C(9)–Si(2)–C(10)  | 107.0(5) |
| C(9)–Si(2)–C(11)  | 110.3(4) |
| C(10)–Si(2)–C(11) | 109.2(5) |
| C(9)–Si(2)–C(5)   | 106.6(4) |
| C(10)–Si(2)–C(5)  | 112.8(4) |
| C(11)–Si(2)–C(5)  | 110.9(4) |
| C(13)–Si(3)–C(17) | 107.2(4) |
| C(13)–Si(3)–C(19) | 113.4(4) |
| C(17)–Si(3)–C(19) | 107.8(4) |
| C(13)–Si(3)–C(18) | 110.1(4) |
| C(17)–Si(3)–C(18) | 109.9(5) |
| C(19)–Si(3)–C(18) | 108.4(4) |
| C(22)–Si(4)–C(20) | 108.6(5) |
| C(22)–Si(4)–C(16) | 110.0(4) |

**Table S3.** *Cont.*

|                   |          |
|-------------------|----------|
| C(20)–Si(4)–C(16) | 107.7(4) |
| C(22)–Si(4)–C(21) | 112.4(6) |
| C(20)–Si(4)–C(21) | 106.0(6) |
| C(16)–Si(4)–C(21) | 111.9(4) |
| C(23)–O(1)–Ce(1)  | 175.9(5) |
| C(27)–O(2)–Ce(1)  | 174.4(6) |
| C(5)–C(1)–C(2)    | 111.9(8) |
| C(5)–C(1)–Ce(1)   | 75.9(5)  |
| C(2)–C(1)–Ce(1)   | 75.9(5)  |
| C(1)–C(2)–C(3)    | 103.8(8) |
| C(1)–C(2)–Si(1)   | 125.9(7) |
| C(3)–C(2)–Si(1)   | 128.9(7) |
| C(1)–C(2)–Ce(1)   | 75.0(5)  |
| C(3)–C(2)–Ce(1)   | 72.5(5)  |
| Si(1)–C(2)–Ce(1)  | 127.2(5) |
| C(4)–C(3)–C(2)    | 110.0(8) |
| C(4)–C(3)–Ce(1)   | 74.9(5)  |
| C(2)–C(3)–Ce(1)   | 77.8(5)  |
| C(3)–C(4)–C(5)    | 109.2(8) |
| C(3)–C(4)–Ce(1)   | 75.7(5)  |
| C(5)–C(4)–Ce(1)   | 78.4(5)  |
| C(4)–C(5)–C(1)    | 105.1(7) |
| C(4)–C(5)–Si(2)   | 128.7(6) |
| C(1)–C(5)–Si(2)   | 124.7(7) |
| C(4)–C(5)–Ce(1)   | 72.3(5)  |
| C(1)–C(5)–Ce(1)   | 75.0(5)  |
| Si(2)–C(5)–Ce(1)  | 128.2(4) |
| C(16)–C(12)–C(13) | 112.4(8) |
| C(16)–C(12)–Ce(1) | 76.0(5)  |
| C(13)–C(12)–Ce(1) | 75.0(4)  |
| C(12)–C(13)–C(14) | 103.5(7) |
| C(12)–C(13)–Si(3) | 125.9(6) |
| C(14)–C(13)–Si(3) | 129.0(6) |
| C(12)–C(13)–Ce(1) | 75.5(5)  |
| C(14)–C(13)–Ce(1) | 74.0(4)  |
| Si(3)–C(13)–Ce(1) | 125.9(4) |
| C(15)–C(14)–C(13) | 110.6(7) |
| C(15)–C(14)–Ce(1) | 75.9(5)  |
| C(13)–C(14)–Ce(1) | 76.1(4)  |
| C(14)–C(15)–C(16) | 108.6(7) |
| C(14)–C(15)–Ce(1) | 75.1(5)  |
| C(16)–C(15)–Ce(1) | 76.5(5)  |
| C(12)–C(16)–C(15) | 104.8(7) |
| C(12)–C(16)–Si(4) | 125.8(7) |
| C(15)–C(16)–Si(4) | 128.4(7) |

**Table S3.** *Cont.*

|                     |           |
|---------------------|-----------|
| C(12)–C(16)–Ce(1)   | 74.9(5)   |
| C(15)–C(16)–Ce(1)   | 73.6(5)   |
| Si(4)–C(16)–Ce(1)   | 125.0(4)  |
| O(1)–C(23)–C(26)    | 109.1(7)  |
| O(1)–C(23)–C(25)    | 108.6(7)  |
| C(26)–C(23)–C(25)   | 111.3(8)  |
| O(1)–C(23)–C(24)    | 108.8(7)  |
| C(26)–C(23)–C(24)   | 108.9(7)  |
| C(25)–C(23)–C(24)   | 110.1(8)  |
| O(2)–C(27)–C(28)    | 110.9(11) |
| O(2)–C(27)–C(29')   | 108.3(19) |
| O(2)–C(27)–C(30')   | 139(6)    |
| C(29')–C(27)–C(30') | 102(7)    |
| O(2)–C(27)–C(30)    | 108.2(11) |
| C(28)–C(27)–C(30)   | 115.1(14) |
| O(2)–C(27)–C(28')   | 101.7(17) |
| C(29')–C(27)–C(28') | 103(3)    |
| C(30')–C(27)–C(28') | 98(6)     |
| O(2)–C(27)–C(29)    | 108.5(10) |
| C(28)–C(27)–C(29)   | 107.7(15) |
| C(30)–C(27)–C(29)   | 106.1(13) |

**Table S4.** Anisotropic displacement parameters ( $\text{\AA}^2 \times 10^3$ ) for apx539\_fulla. The anisotropic displacement factor exponent takes the form:  $-2 \pi^2 [h^2 a^{*2} U^{11} + \dots + 2 h k a^* b^* U^{12}]$ .

|       | $U^{11}$ | $U^{22}$ | $U^{33}$ | $U^{23}$ | $U^{13}$ | $U^{12}$ |
|-------|----------|----------|----------|----------|----------|----------|
| Ce(1) | 21(1)    | 34(1)    | 39(1)    | −1(1)    | 11(1)    | −1(1)    |
| Si(1) | 30(2)    | 47(2)    | 106(3)   | 14(2)    | 36(2)    | 4(1)     |
| Si(2) | 41(2)    | 39(2)    | 52(2)    | 12(1)    | 27(1)    | 17(1)    |
| Si(3) | 24(1)    | 40(2)    | 43(2)    | −8(1)    | 13(1)    | −4(1)    |
| Si(4) | 44(2)    | 47(2)    | 36(2)    | −4(1)    | 21(1)    | 5(1)     |
| O(1)  | 27(3)    | 35(3)    | 39(4)    | 5(3)     | 8(3)     | 11(3)    |
| O(2)  | 43(4)    | 43(4)    | 60(4)    | −16(3)   | 19(3)    | −7(3)    |
| C(1)  | 38(6)    | 30(5)    | 72(7)    | 6(5)     | 35(5)    | 5(4)     |
| C(2)  | 38(6)    | 37(5)    | 67(7)    | 7(5)     | 34(5)    | 5(5)     |
| C(3)  | 28(5)    | 42(6)    | 48(6)    | 6(5)     | 19(4)    | 7(4)     |
| C(4)  | 30(5)    | 36(5)    | 44(5)    | −1(5)    | 19(4)    | 1(4)     |
| C(5)  | 31(5)    | 36(5)    | 32(5)    | −3(4)    | 19(4)    | −1(4)    |
| C(6)  | 101(9)   | 111(9)   | 181(10)  | 35(8)    | 59(7)    | −18(7)   |
| C(7)  | 47(7)    | 118(11)  | 93(9)    | −1(8)    | 43(7)    | 23(7)    |
| C(8)  | 35(6)    | 127(12)  | 116(11)  | −26(9)   | 15(7)    | 10(8)    |
| C(9)  | 50(6)    | 40(6)    | 45(6)    | 1(5)     | 19(5)    | −1(5)    |
| C(10) | 84(9)    | 53(7)    | 72(8)    | 16(6)    | 46(7)    | 37(6)    |
| C(11) | 47(6)    | 46(6)    | 63(7)    | 15(5)    | 24(5)    | 3(5)     |
| C(12) | 31(5)    | 33(5)    | 37(5)    | −2(4)    | 23(4)    | −3(4)    |

**Table S4.** *Cont.*

|        | U <sup>11</sup> | U <sup>22</sup> | U <sup>33</sup> | U <sup>23</sup> | U <sup>13</sup> | U <sup>12</sup> |
|--------|-----------------|-----------------|-----------------|-----------------|-----------------|-----------------|
| C(13)  | 27(5)           | 35(5)           | 38(5)           | −1(4)           | 21(4)           | −6(4)           |
| C(14)  | 21(4)           | 42(6)           | 41(6)           | 1(5)            | 11(4)           | −1(4)           |
| C(15)  | 27(5)           | 27(5)           | 41(6)           | 7(4)            | 15(4)           | 10(4)           |
| C(16)  | 32(5)           | 43(6)           | 35(5)           | 0(4)            | 17(4)           | 5(4)            |
| C(17)  | 42(6)           | 53(7)           | 72(7)           | −20(6)          | 26(6)           | −21(5)          |
| C(18)  | 32(5)           | 59(7)           | 41(6)           | −4(5)           | 2(4)            | 3(5)            |
| C(19)  | 38(5)           | 40(6)           | 37(6)           | −14(4)          | 13(4)           | −2(4)           |
| C(20)  | 91(9)           | 61(7)           | 55(7)           | −13(6)          | 37(7)           | −20(7)          |
| C(21)  | 68(9)           | 165(14)         | 39(7)           | 15(8)           | 18(6)           | 42(9)           |
| C(22)  | 122(11)         | 45(6)           | 63(8)           | −17(6)          | 59(8)           | −10(7)          |
| C(23)  | 22(5)           | 45(6)           | 49(6)           | −6(5)           | 15(4)           | −3(4)           |
| C(24)  | 47(6)           | 59(7)           | 42(6)           | 4(5)            | 15(5)           | 13(5)           |
| C(25)  | 30(6)           | 72(7)           | 50(6)           | −5(6)           | 7(5)            | 12(5)           |
| C(26)  | 29(5)           | 39(6)           | 58(7)           | 5(5)            | 16(5)           | 5(4)            |
| C(27)  | 56(7)           | 60(8)           | 86(9)           | −12(7)          | 37(7)           | −14(6)          |
| C(28)  | 63(8)           | 77(8)           | 85(8)           | −7(6)           | 31(6)           | −4(6)           |
| C(28') | 63(8)           | 77(8)           | 85(8)           | −7(6)           | 31(6)           | −4(6)           |
| C(29)  | 78(12)          | 78(10)          | 43(10)          | 3(8)            | 15(8)           | −21(10)         |
| C(29') | 78(12)          | 78(10)          | 43(10)          | 3(8)            | 15(8)           | −21(10)         |
| C(30)  | 73(12)          | 70(9)           | 107(15)         | −44(10)         | 34(11)          | −17(9)          |
| C(30') | 73(12)          | 70(9)           | 107(15)         | −44(10)         | 34(11)          | −17(9)          |

**Table S5.** Hydrogen coordinates ( $\times 10^4$ ) and isotropic displacement parameters ( $\text{\AA}^2 \times 10^3$ ) for apx539\_fulla.

|        | <i>x</i> | <i>y</i> | <i>z</i> | U(eq) |
|--------|----------|----------|----------|-------|
| H(1)   | 6248     | 545      | 10,673   | 52    |
| H(3)   | 6758     | 1648     | 11,871   | 46    |
| H(4)   | 8982     | 1350     | 12,736   | 43    |
| H(6A)  | 3652     | 693      | 11,705   | 199   |
| H(6B)  | 4036     | 484      | 10,660   | 199   |
| H(6C)  | 2593     | 653      | 10,165   | 199   |
| H(7A)  | 4034     | 1783     | 11,042   | 122   |
| H(7B)  | 2787     | 1561     | 10,978   | 122   |
| H(7C)  | 4194     | 1505     | 12,237   | 122   |
| H(8A)  | 3265     | 1018     | 8042     | 150   |
| H(8B)  | 2163     | 1233     | 8293     | 150   |
| H(8C)  | 3356     | 1465     | 8277     | 150   |
| H(9A)  | 8411     | 187      | 13,968   | 69    |
| H(9B)  | 7757     | −24      | 12,548   | 69    |
| H(9C)  | 9203     | −136     | 13,641   | 69    |
| H(10A) | 9956     | 377      | 10,798   | 98    |
| H(10B) | 10,201   | −14      | 11,593   | 98    |
| H(10C) | 8755     | 98       | 10,499   | 98    |



**Table S5.** *Cont.*

|        | <i>x</i> | <i>y</i> | <i>z</i> | U(eq) |
|--------|----------|----------|----------|-------|
| H(11A) | 11,259   | 809      | 13,515   | 79    |
| H(11B) | 10,759   | 734      | 14,623   | 79    |
| H(11C) | 11,522   | 410      | 14,262   | 79    |
| H(12)  | 8954     | 1955     | 8716     | 37    |
| H(14)  | 10,484   | 1069     | 11,321   | 43    |
| H(15)  | 9621     | 812      | 8983     | 38    |
| H(17A) | 11,744   | 2542     | 12,112   | 84    |
| H(17B) | 12,079   | 2239     | 11,250   | 84    |
| H(17C) | 10,742   | 2474     | 10,567   | 84    |
| H(18A) | 12,092   | 1920     | 14,246   | 75    |
| H(18B) | 11,300   | 1533     | 13,758   | 75    |
| H(18C) | 12,461   | 1628     | 13,379   | 75    |
| H(19A) | 9628     | 2393     | 12,994   | 60    |
| H(19B) | 8597     | 2348     | 11,447   | 60    |
| H(19C) | 8736     | 2022     | 12,497   | 60    |
| H(20A) | 9520     | 1966     | 6332     | 101   |
| H(20B) | 10,516   | 1626     | 6541     | 101   |
| H(20C) | 9360     | 1713     | 5078     | 101   |
| H(21A) | 6723     | 1826     | 5715     | 140   |
| H(21B) | 6556     | 1586     | 4432     | 140   |
| H(21C) | 6147     | 1407     | 5504     | 140   |
| H(22A) | 8104     | 720      | 5975     | 105   |
| H(22B) | 8434     | 899      | 4846     | 105   |
| H(22C) | 9590     | 813      | 6309     | 105   |
| H(23A) | 6108     | 2657     | 7774     | 76    |
| H(23B) | 7281     | 2451     | 9008     | 76    |
| H(23C) | 6881     | 2317     | 7503     | 76    |
| H(24A) | 3948     | 2301     | 6439     | 82    |
| H(24B) | 4748     | 1965     | 6187     | 82    |
| H(24C) | 3796     | 1878     | 6854     | 82    |
| H(25A) | 4616     | 2521     | 8849     | 65    |
| H(25B) | 4457     | 2099     | 9260     | 65    |
| H(25C) | 5814     | 2318     | 10,065   | 65    |
| H(28A) | 4952     | 273      | 8241     | 114   |
| H(28B) | 4123     | 179      | 6678     | 114   |
| H(28C) | 3938     | 576      | 7253     | 114   |
| H(28D) | 6092     | 151      | 8627     | 114   |
| H(28E) | 4664     | 82       | 7417     | 114   |
| H(28F) | 4900     | 420      | 8453     | 114   |
| H(29A) | 4408     | 919      | 5516     | 106   |
| H(29B) | 4418     | 503      | 4958     | 106   |
| H(29C) | 5643     | 778      | 5325     | 106   |
| H(29D) | 4139     | 926      | 6296     | 106   |
| H(29E) | 3633     | 499      | 6065     | 106   |

**Table S5.** *Cont.*

|        | <i>x</i> | <i>y</i> | <i>z</i> | <b>U(eq)</b> |
|--------|----------|----------|----------|--------------|
| H(29F) | 4268     | 674      | 5171     | 106          |
| H(30A) | 7193     | 382      | 6756     | 129          |
| H(30B) | 6247     | 37       | 6650     | 129          |
| H(30C) | 7230     | 203      | 8089     | 129          |
| H(30D) | 5160     | 94       | 5798     | 129          |
| H(30E) | 6195     | 375      | 5672     | 129          |
| H(30F) | 6654     | 93       | 6923     | 129          |
